# Supplementary material for: Quantum yield enhancement in the photocatalytic HCOOH decomposition to H2 under periodic illumination
Source: Royal Society of Chemistry journal article supplement (doi:10.1039/d2cy00935h), 2022-01-01
Supplement: d2cy00935h1.pdf [file d2cy00935h1.pdf]

# Quantum Yield Enhancement in Photocatalytic HCOOH Decomposition to H<sub>2</sub> under Periodic Illumination

Sie Shing Wong<sup>a,b</sup>, Max Joshua Hülsey<sup>b</sup>, Hua An<sup>a,b</sup>, Ning Yan<sup>b,\*</sup>

<sup>a</sup> Joint School of National University of Singapore and Tianjin University, International  
Campus of Tianjin University, Binhai New City, Fuzhou 350207, P. R. China

<sup>b</sup> Department of Chemical and Biomolecular Engineering, National University of Singapore,  
117585 Singapore

\*Corresponding author: [ning.yan@nus.edu.sg](mailto:ning.yan@nus.edu.sg)

## Materials and methods

### Photochemical Impedance Spectroscopy (PEIS)

Electrochemical Impedance Spectroscopy (EIS) is a useful and easy-to-use technique to evaluate the behaviour photocatalytic systems and phenomena occurring at the semiconductor/electrolyte interface, such as charge transport resistances and electron-hole recombination rates.<sup>1</sup> The principle of EIS is the application of by applying a small sinusoidal perturbation to the system while the amplitude and phase shift of the resulting current response are simultaneously recorded.<sup>2, 3</sup> To calculate capacitance of the system, the fitted model parameters for constant phase elements in the proposed ECMs are converted into equivalent capacitance by applying **Eq. (S1)**, which is related to interfacial modelling of electrochemical systems.<sup>4, 5</sup>

$$C_i = Q_{0,i}(\omega_{max})^{n-1} \quad (\text{S1})$$

where  $C_i$  is the capacitance of circuit element  $i$ ,  $Q_{0,i}$  is the admittance of constant phase element  $i$ ,  $\omega_{max}$  is the angular frequency at which the maximum in the imaginary component of the measured impedance occurs and exponent  $n$  defines the extent of ideal capacitive behaviour:  $n = 0$  for a perfect resistor while  $n = 1$  for a perfect capacitor.

### Fitting of PEIS data

In this work, the proposed ECMs were presented in **Fig. S1**. EIS measurements under dark condition can be modelled as a conventional Randle's circuit as shown in **Fig. S1a**. The main difference between both models would be the replacement of capacitor to a constant phase element ( $\text{CPE}_{\text{CT}}$ ) to model the non-ideal capacitance in the double-layer at the photoelectrode/electrolyte interface due to inhomogeneous surface of the semiconductor electrode. Resistors are included in the ECM, where  $R_{\text{CT}}$  describes the Faradaic charge transfer across the interfacial layers while  $R_s$  represents series resistance to charge transfer, including resistance related ionic conductivity of the electrolyte, resistance of FTO glass and external

contact resistance.<sup>2</sup> On the other hand, EIS data under both static and periodic illuminations can be fitted with ECM presented in **Fig. S1b**. In this model, there is an additional series combination of resistor and constant phase element, which is in parallel to the R||CPE circuit. The additional elements are denoted as  $R_{SS}$  and  $CPE_{SS}$  to represent the trapping of charge carriers by surface states, such as defect states (including vacancies, lattice imperfections and interstitial impurities) within the catalyst<sup>2, 6-8</sup> or the catalyst surface forming complexation with adsorbates.<sup>7, 9, 10</sup> These surface trap states generally becomes sites for surface-related non-radiative recombination by reacting with electron acceptors or donors to form radicals. As a result, presence of surface states may hinder recombination rates, thus increasing the carriers' lifetimes up to approximately microsecond time scale.<sup>11</sup> The quality of fit for PEIS data under periodic illumination at different duty cycles can be found in **Fig. S2**.

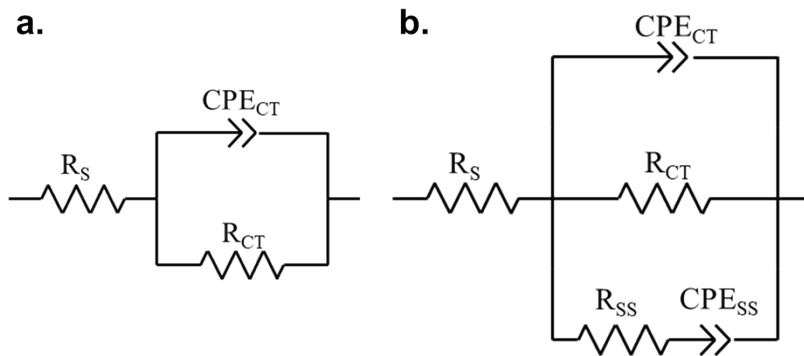

**Fig. S1.** Proposed ECM model for EIS measurements under **a.** dark and **b.** illumination conditions.

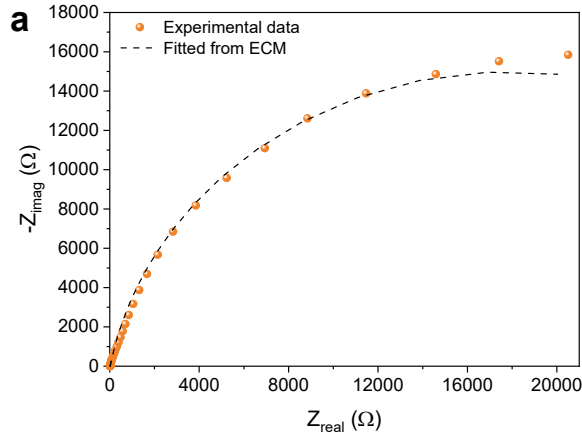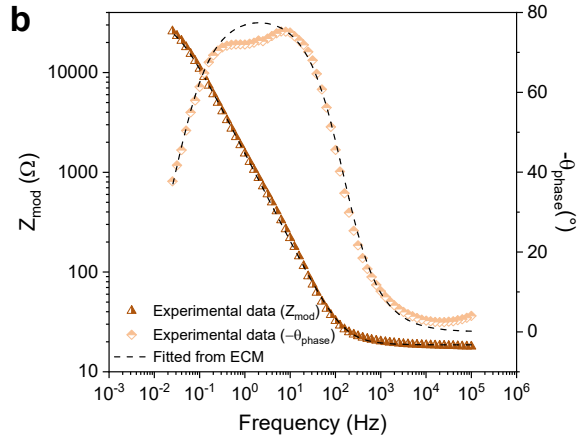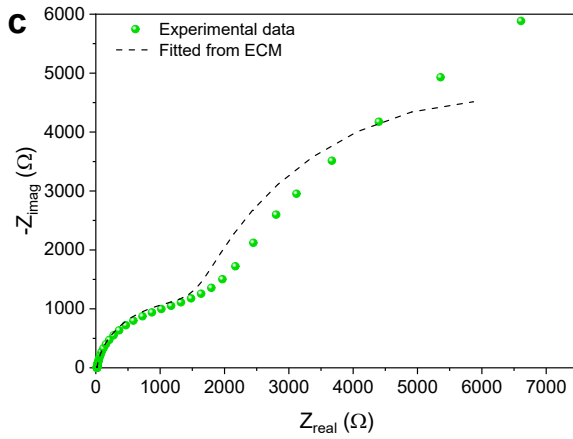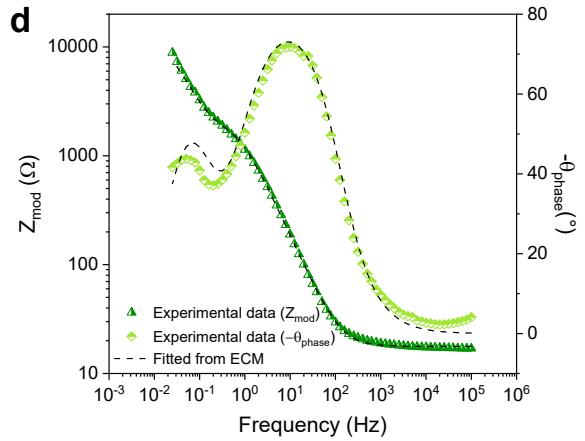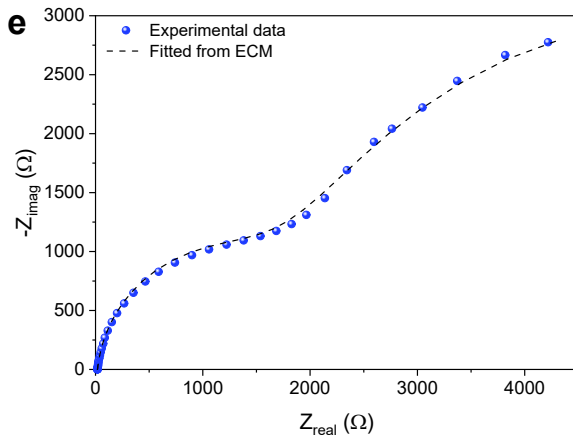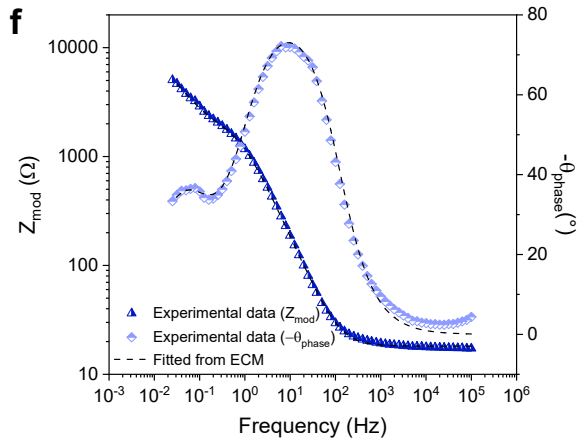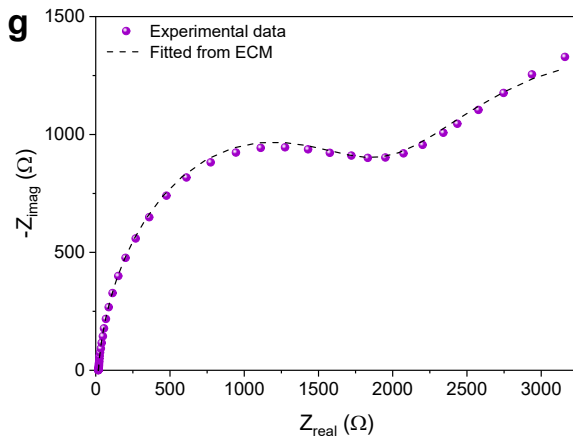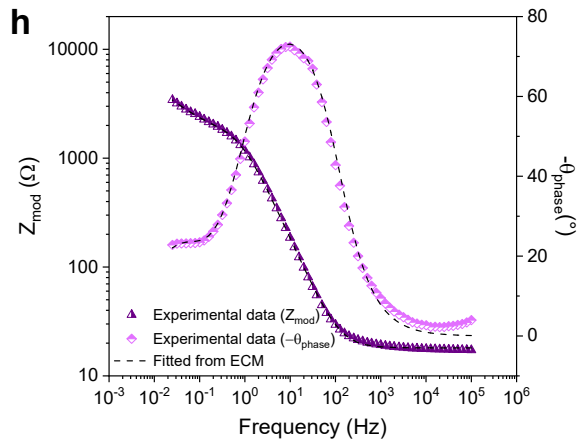

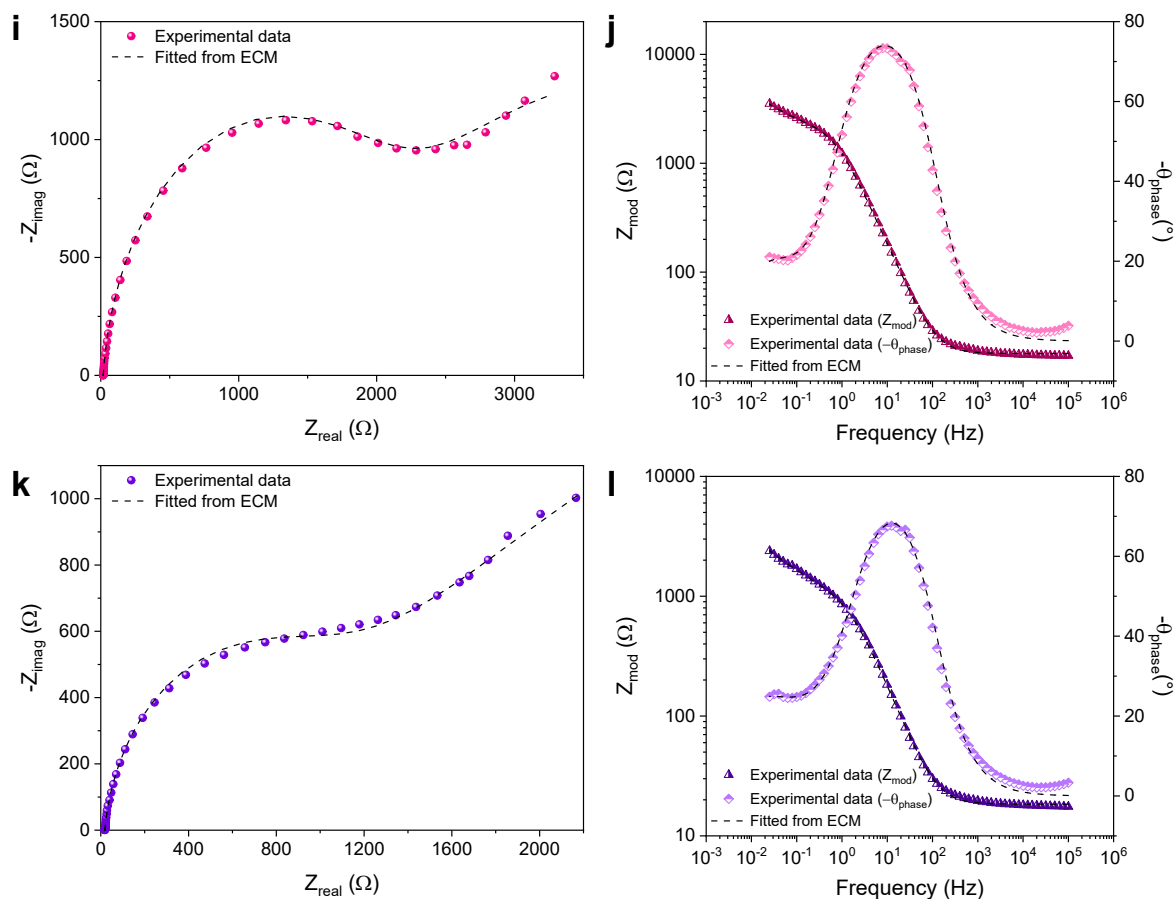

**Fig. S2.** Fitting of EIS data with the proposed ECM: Nyquist plot and Bode plot under (a, b) dark, periodic illumination with (c, d) 10%, (e, f) 25% and (g, h) 50%, (i, j) 75% duty cycles and (k, l) static illumination conditions respectively. Conditions: Room temperature with magnetic stirring, 50 mM HCOOH, 150 mL electrolyte solution, 25 mL/min  $\text{N}_2$ , distance between the light source and working electrode was maintained at 33 cm throughout the experiment, 3 mg Pt/TiO<sub>2</sub> deposited on FTO glass working electrode, Pt plate counter electrode and standard calomel reference electrode.

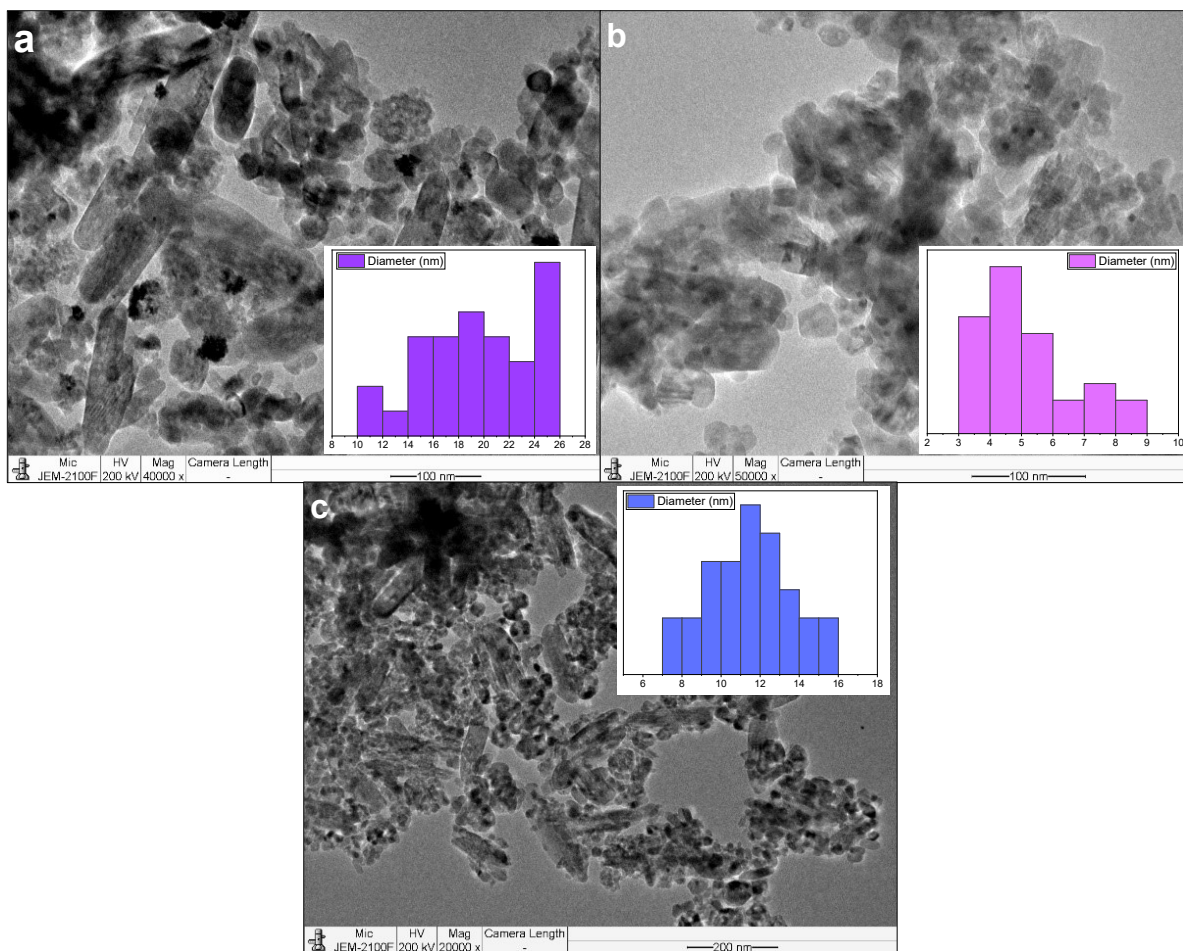

**Fig. S3.** TEM images for TiO<sub>2</sub>-supported **a.** Pt, **b.** Au and **c.** Pd-supported TiO<sub>2</sub> catalysts.

## XPS Analysis

Among the three catalysts, it is evident that their Ti 2p XPS spectra are identical with Ti 2p<sub>3/2</sub> and 2p<sub>1/2</sub> peaks centered at binding energies of 458.8-458.9 eV and 464.4-464.6 eV respectively as shown in **Fig. S4b, S4d** and **S4f**. These values are consistent with typical values of Ti<sup>4+</sup> on TiO<sub>2</sub> via XPS analysis.<sup>12-14</sup> The Pt 4f spectrum is fitted with two components, where the 4f<sub>7/2</sub> and 4f<sub>5/2</sub> peaks located at 70.6 eV and 73.8 eV respectively are characteristic for metallic Pt<sup>0</sup>. The other peaks with lower intensity at 73.0 eV and 76.3 eV are associated with Pt<sup>2+</sup>.<sup>15-18</sup> Based on the relative peak areas in the Pt 4f spectrum (**Fig. S4a**), we estimate the ratio of Pt<sup>0</sup> to Pt<sup>2+</sup> to be 2:1. Similarly, the Pd 3d XPS spectra (**Fig. S4e**) were deconvoluted into two components, where Pd<sup>0</sup> can be identified as 3d<sub>5/2</sub> and 3d<sub>3/2</sub> peaks at 335.5 eV and 340.5 eV respectively, while Pd<sup>2+</sup> was identified as the corresponding peaks at 337.4 eV and 342.5 eV, likely in the form of PdO.<sup>19-22</sup> The Pd<sup>0</sup>: Pd<sup>2+</sup> ratio is estimated to be 7:3, similar to Pt<sup>0</sup>: Pt<sup>2+</sup> ratio in Pt/TiO<sub>2</sub>. On the contrary, Au/TiO<sub>2</sub> primarily consists of metallic Au<sup>0</sup> nanoparticles with 4f<sub>7/2</sub> and 4f<sub>5/2</sub> peaks located at 83.7 eV and 87.3 eV respectively as shown in **Fig. S4c**.<sup>12, 13</sup>

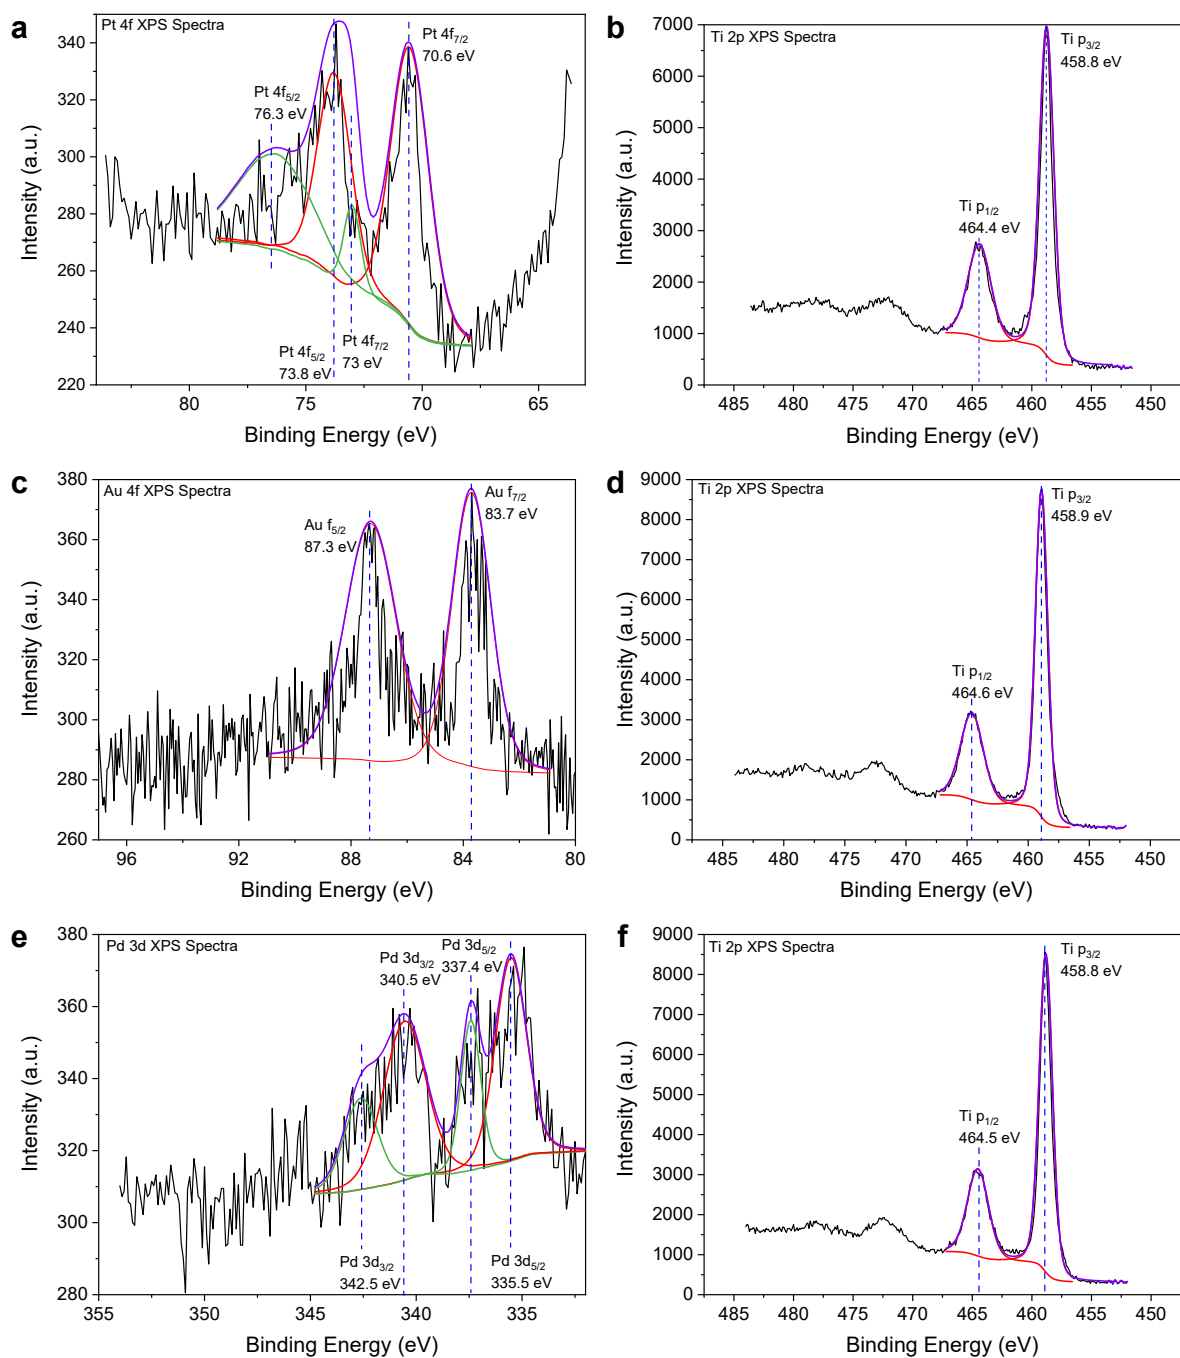

**Fig. S4a.** Pt 4f and **b.** Ti 2p XPS spectra of Pt/TiO<sub>2</sub> photocatalysts. **c.** Au 4f and **d.** Ti 2p XPS spectra of Au/TiO<sub>2</sub> photocatalysts. **e.** Pd 3d and **f.** Ti 2p XPS spectra of Pd/TiO<sub>2</sub> photocatalysts. Red line: simulated peak for element with zero valence. Green line: simulated XPS peak for element with charge of 2+. Purple line: simulated peaks for overall XPS spectrum.



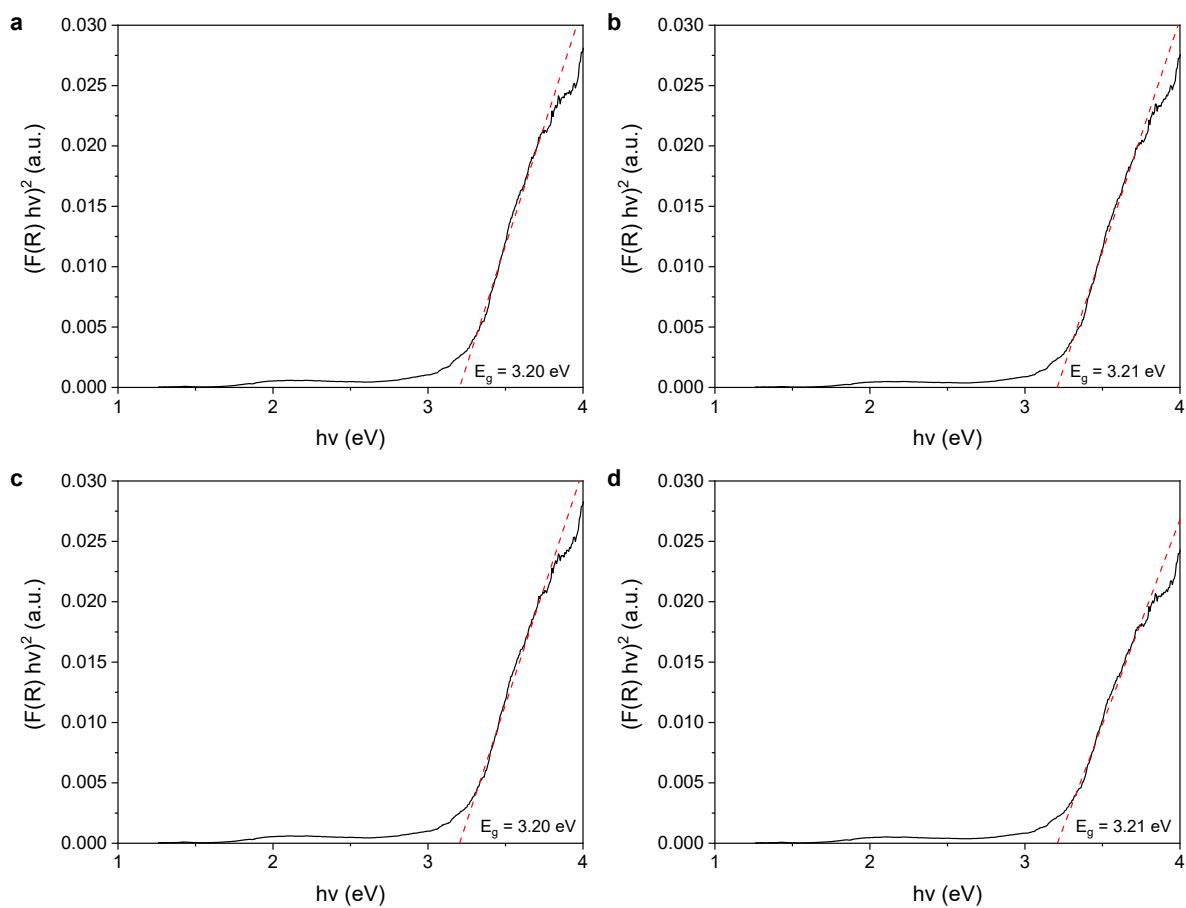

**Fig. S5.** Kubelka-Munk function for **a.** Bare, **b.** Pt-, **c.** Au- and **d.** Pd-supported  $\text{TiO}_2$  catalysts.

## Model fitting

The kinetic model proposed by Prozzi *et al.* is as shown below<sup>23</sup>:

$$\frac{k_{Deg}^{CPI}}{k_{Deg}} = (1+r)^{-1} \left\{ 1 + m^{-1} \ln \left[ 1 + \frac{rm}{1 + \left( \frac{[h_s^+]_2}{[h_s^+]_{ss}} \right)^{-1}} \right] \right\}$$

with

$$\frac{[h_s^+]_2}{[h_s^+]_{ss}} = \frac{rm \tanh(m) + \sqrt{[rm \tanh(m)]^2 + 4[rm + \tanh(m)] \tanh^2(m)}}{2[rm + \tanh(m)]}$$

$$\tau_L = \sqrt{(k_{2,v} \bar{\Phi}_v)^{-1}}$$

where  $k_{Deg}^{CPI}$  is the rate of formate degradation under controlled periodic illumination,  $k_{Deg}$  is the rate of formate degradation under static illumination,  $r = \gamma^{-1}(1-\gamma)$ ,  $m = \frac{t_{ON}}{\tau_L}$ ,  $k_{2,v}$  is the rate constant for recombination process and  $\bar{\Phi}_v$  is the average incident photon flux introduced into the system. In this work,  $k_{2,v}$  was estimated to be  $3.2 \times 10^{-11}$  cm<sup>3</sup>/s and  $\tau_L$  is estimated by using Bode plots (**Fig. S2**) from PEIS measurements and from Eq. (S2).

The charge carrier lifetime on Pt/TiO<sub>2</sub> can be estimated by Equation (S1), where  $f_{max}$  can be determined from Bode plots generated after conducting EIS analysis of Pt/TiO<sub>2</sub> under static and periodic illumination.  $f_{max}$  is defined as the frequency at which the maximum in the imaginary component of the measured impedance occurs.<sup>3, 5, 9, 24, 25</sup> According to Kern *et al.*, the medium frequency peaks (within the range of 10-100 Hz) in the Bode plot represent the properties of the photoinjected electrons within the TiO<sub>2</sub> and this property is independent of the TiO<sub>2</sub> layer thickness at  $f_{max}$ .<sup>24</sup>

$$\tau_e = \frac{1}{\omega_{max}} = \frac{1}{2\pi f_{max}} \quad (S2)$$

where  $\tau_e$  is the lifetime of photogenerated charge carriers.

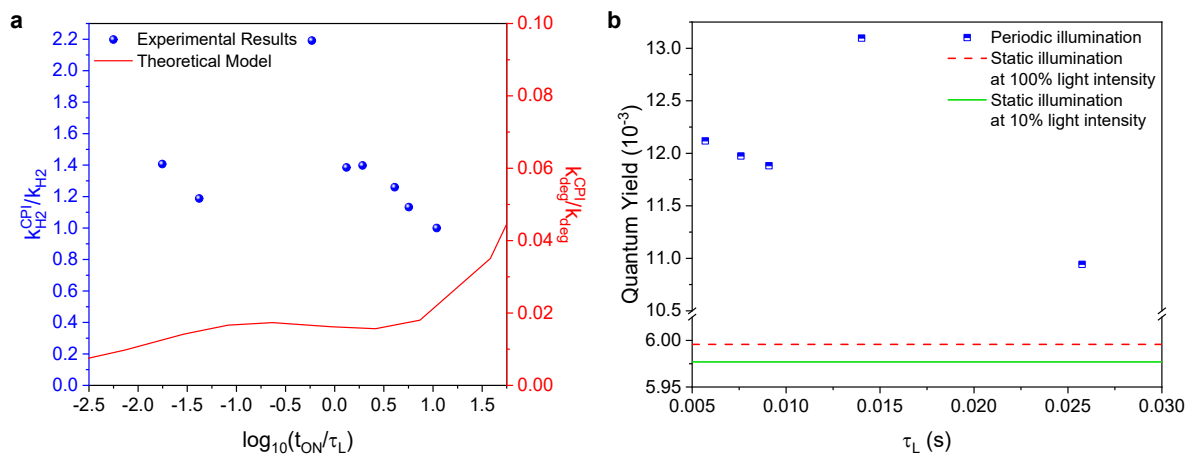

**Fig. S6a.** Ratio of photocatalytic reaction rate under controlled periodic illumination (CPI) and continuous illumination versus logarithm of the ratio between  $t_{\text{ON}}$  and  $\tau_L$ . **b.** Comparison between reaction quantum yield under periodic illumination at 10% duty cycle and static illumination at 10% and 100% light intensity.

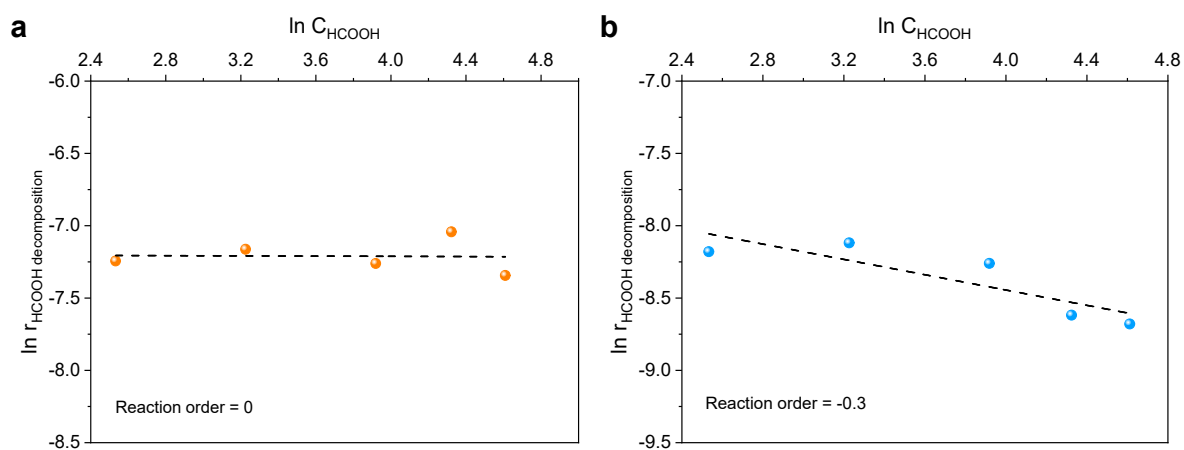

**Fig. S7.** Reaction kinetics of photodecomposition of HCOOH under static and periodic illumination. Plot of  $\ln (r_{\text{HCOOH decomposition}})$  against  $\ln (C_{\text{HCOOH}})$  for reaction at **a.** static illumination and **b.** periodic illumination with 10% duty cycle. Reaction conditions:  $30 \pm 2$  °C, 30 mL reaction volume, 10 mg Pt/TiO<sub>2</sub>, 800 rpm stirring rate, 5 bar N<sub>2</sub>, normalised at 2 hours reaction time.

**Table S1** Fitted EIS data parameters according to resistors in the proposed ECMs.

| Duty Cycle (%) | $R_S$ ( $\Omega$ ) |                    | $R_{CT}$ ( $\Omega$ ) |                    | $R_{SS}$ ( $\Omega$ ) |                    |
|----------------|--------------------|--------------------|-----------------------|--------------------|-----------------------|--------------------|
|                | Average            | Standard Deviation | Average               | Standard Deviation | Average               | Standard Deviation |
| 0              | 18.40              | 0.35               | 32733                 | 7061               | -                     | -                  |
| 10             | 17.65              | 0.10               | 14157                 | 3440               | 2862                  | 214                |
| 25             | 18.02              | 0.12               | 10811                 | 1860               | 2691                  | 132                |
| 50             | 17.94              | 0.14               | 6591                  | 1403               | 3087                  | 152                |
| 75             | 17.77              | 0.10               | 6203                  | 351                | 3672                  | 121                |
| 100            | 18.29              | 0.09               | 6608                  | 1504               | 1339                  | 131                |

**Table S2** Fitted EIS data parameters according to capacitors in the proposed ECMs.

| Duty Cycle (%) | $C_{CT}$ ( $\Omega$ ) |                    | $C_{SS}$ ( $\Omega$ ) |                    |
|----------------|-----------------------|--------------------|-----------------------|--------------------|
|                | Average               | Standard Deviation | Average               | Standard Deviation |
| 0              | 100.27                | 9.48               | -                     | -                  |
| 10             | 85.26                 | 1.72               | 317                   | 27                 |
| 25             | 85.48                 | 2.25               | 217                   | 28                 |
| 50             | 86.83                 | 1.36               | 283                   | 53                 |
| 75             | 88.48                 | 1.93               | 225                   | 32                 |
| 100            | 85.92                 | 2.43               | 156                   | 32                 |

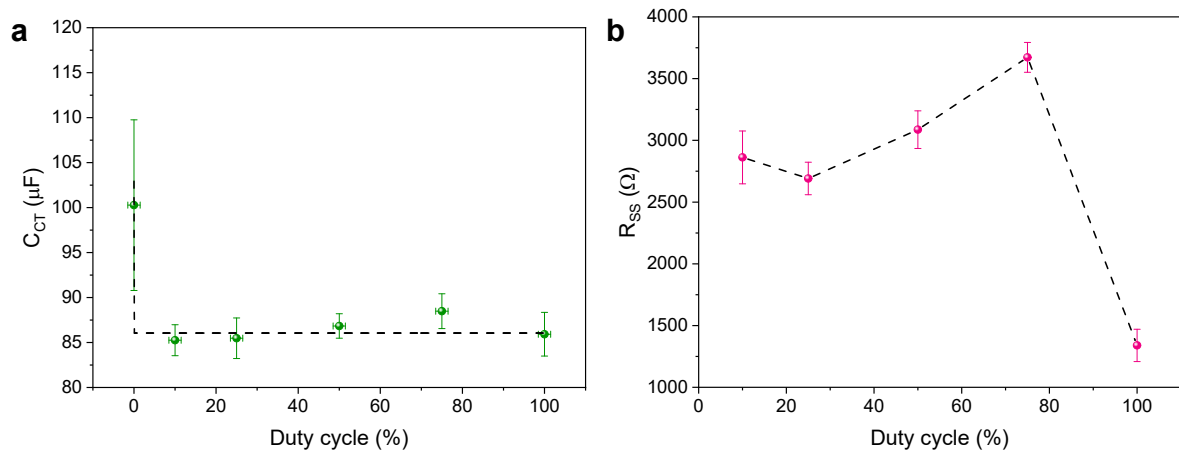**Fig. S8.** a.  $C_{CT}$  and b.  $R_{SS}$  of Pt/TiO<sub>2</sub> at different duty cycles.

## References

1. J. Ângelo, P. Magalhães, L. Andrade and A. Mendes, *Appl. Surf. Sci.*, 2016, **387**, 183-189.
2. A. R. C. Bredar, A. L. Chown, A. R. Burton and B. H. Farnum, *ACS Appl. Energy Mater.*, 2020, **3**, 66-98.
3. Y. Liu, D. Pan, M. Xiong, Y. Tao, X. Chen, D. Zhang, Y. Huang and G. Li, *Chinese J. Catal.*, 2020, **41**, 1554-1563.
4. A. Hankin, F. E. Bedoya-Lora, J. C. Alexander, A. Regoutz and G. H. Kelsall, *J. Mater. Chem. A*, 2019, **7**, 26162-26176.
5. S. Aslam, F. Mustafa, M. A. Ahmad, M. Saleem, M. Idrees and A. S. Bhatti, *Ceram. Int.*, 2018, **44**, 402-408.
6. J. Nelson, A. M. Eppler and I. M. Ballard, *J. Photochem. Photobiol. A*, 2002, **148**, 25-31.
7. A. J. Bard, F.-R. F. Fan, A. S. Gioda, G. Nagasubramanian and H. S. White, *Faraday Discuss. Chem. Soc.*, 1980, **70**, 19-31.
8. S. Yanagida, K. Mizumoto and C. Pac, *J. Am. Chem. Soc.*, 1986, **108**, 647-654.
9. V. Senthil, T. Badapanda, A. Chithambararaj, A. Chandra Bose and S. Panigrahi, *Int. J. Hydrog. Energy*, 2016, **41**, 22856-22865.
10. W. H. Leng, Z. Zhang, J. Q. Zhang and C. N. Cao, *J. Phys. Chem. B*, 2005, **109**, 15008-15023.
11. W. D. Kim, J.-H. Kim, S. Lee, S. Lee, J. Y. Woo, K. Lee, W.-S. Chae, S. Jeong, W. K. Bae, J. A. McGuire, J. H. Moon, M. S. Jeong and D. C. Lee, *Chem. Mater.*, 2016, **28**, 962-968.
12. H. Chen, G. Liu and L. Wang, *Sci. Rep.*, 2015, **5**, 10852.
13. N. Kruse and S. Chenakin, *Appl. Catal. A*, 2011, **391**, 367-376.
14. G. Wang, H. Wang, Y. Ling, Y. Tang, X. Yang, R. C. Fitzmorris, C. Wang, J. Z. Zhang and Y. Li, *Nano Lett.*, 2011, **11**, 3026-3033.
15. J. C. Colmenares, A. Magdziarz, M. A. Aramendia, A. Marinas, J. M. Marinas, F. J. Urbano and J. A. Navio, *Catal. Commun.*, 2011, **16**, 1-6.
16. M. Macino, A. J. Barnes, S. M. Althahban, R. Qu, E. K. Gibson, D. J. Morgan, S. J. Freakley, N. Dimitratos, C. J. Kiely, X. Gao, A. M. Beale, D. Bethell, Q. He, M. Sankar and G. J. Hutchings, *Nat. Catal.*, 2019, **2**, 873-881.
17. L. S. Kibis, D. A. Svintsitskiy, A. I. Stadnichenko, E. M. Slavinskaya, A. V. Romanenko, E. A. Fedorova, O. A. Stonkus, V. A. Svetlichnyi, E. D. Fakhrutdinova, M. Vorokhta, B. Šmíd, D. E. Doronkin, V. Marchuk, J.-D. Grunwaldt and A. I. Boronin, *Catal. Sci. Technol.*, 2021, **11**, 250-263.
18. A. Stadnichenko, D. Svintsitskiy, L. Kibis, E. Fedorova, O. Stonkus, E. Slavinskaya, I. Lapin, E. Fakhrutdinova, V. Svetlichnyi, A. Romanenko, D. Doronkin, V. Marchuk, J.-D. Grunwaldt and A. Boronin, *Appl. Sci.*, 2020, **10**, 4699.
19. F. Niu, S. Li, Y. Zong and Q. Yao, *J. Phys. Chem. C*, 2014, **118**, 19165-19171.
20. P. Wu, Y. Huang, L. Kang, M. Wu and Y. Wang, *Sci. Rep.*, 2015, **5**, 14173.
21. J. B. Zhong, Y. Lu, W. D. Jiang, Q. M. Meng, X. Y. He, J. Z. Li and Y. Q. Chen, *J. Hazard. Mater.*, 2009, **168**, 1632-1635.
22. F. Yang, Y. Xia, B. Zhang, C. Xu, W. Yang and Y. Li, *Colloids Surf. A Physicochem. Eng. Asp.*, 2021, **611**, 125785.
23. M. Prozzi, F. Sordello, S. Barletta, M. Zangirolami, F. Pellegrino, A. Bianco Prevot and V. Maurino, *ACS Catal.*, 2020, **10**, 9612-9623.
24. R. Kern, R. Sastrawan, J. Ferber, R. Stangl and J. Luther, *Electrochim. Acta*, 2002, **47**, 4213-4225.
25. M. Chandra and D. Pradhan, *ChemSusChem*, 2020, **13**, 3005-3016.
